# Supplementary material
Source: publisher figshare collection journal article supplement (https://sage.figshare.com/ndownloader/files/15203129)
Supplement: Supplementary file 1 [file 15203129]

Supplemental Material to Accompany: 
Hiding Behind the Party Brand or Currying Favor with Constituents: Why Do Representatives Engage in Different Types of Constituency-Oriented Behavior?

Note: For Tables 3S-14S, the order of models follow the conventions presented in the manuscript as seen in Tables 1 and 2.


Table 1: Descriptive Statistics
Variable	Obs.	Mean	Std. Dev.	Min	Max	
Constituency-Oriented PQs	202	10.19	50.04	0	665	
Constituency Hours	198	27.12	16.40	1	75	
Pork Barrel	202	3.27	1.34	1	5	
Constituency Help	187	3.84	1.14	1	5	
Constituency Dialogue	202	3.58	1.24	1	5	
Total PQs	202	26.20	78.11	0	765	
Conflict: Party versus Constituency	202	7.00	2.62	1	11	
Ideological Distance	199	1.27	1.26	0	8	
CHP (opposition status)	202	0.34	0.47	0	1	
Perceptions of Party Leadership	203	6.41	1.24	1	8	
Perceptions of Party Congress	203	3.94	3.25	1	8	
Live in District	198	1.71	0.46	1	2	
List Order	198	3.46	2.71	1	14	
District Size	200	8.94	5.78	2	25	
District Size * List Order	197	41.23	60.06	2	350	
Logged GDP	202	7.51	0.46	6	9	
Education	202	5.94	1.10	2	8	
Female	202	0.06	0.25	0	1	


Table 1S
Factor Analyses Estimations for other measures of candidate selection influence	
Variable	Factor1	Uniqueness 	 	 	
Party General Congress	0.7202	0.4812	 	 	
Party Local Branch	0.8074	0.348	 	 	
Party Local Members	0.8983	0.1931	 	 	
Supporters in the District	0.7443	0.446	 	 	
Alpha Coefficient 0.86	
 	 	 	 	 	
Variable	Factor1	Factor2	Uniqueness 	 	
Party Leader	-0.1206	0.2905	0.9011	 	
Party General Congress	0.7239	0.0325	0.4749	 	
Party Local Branch	0.8085	-0.1729	0.3164	 	
Party Local Members	0.8989	-0.0493	0.1895	 	
Supporters in the District	0.7432	0.2633	0.3784	 	
Alpha Coefficient 0.8	


Table 2S: OLS Regression Result of local perception variables on perception of party General congress on candidate selection
	Coefficient	Std. Err.	P-value	
Party Local Branch	0.317089	0.1260438	0.013	
Party Local Members	0.3093498	0.1363421	0.024	
Supporters in the District	0.4390524	0.0921884	0.000	
Constant	-0.796936	0.405039	0.051	


Figure 1S: Distribution of Parliamentary Questions in the 22nd Term of Turkish Parliament
 


Figure 2S: Distribution of Perceptions about Candidate Selection Procedures By Political Party


Table 3S
	Model 1	Model 2	Model 3	
				
Electoral Marginality	0.00908	0.0448	0.000678	
	(0.0107)	(0.0861)	(0.00526)	
Conflict	-0.100*	1.076*	0.0902***	
	(0.0600)	(0.549)	(0.0339)	
Ideological Distance	0.0209	1.432*	-0.140***	
	(0.0735)	(0.766)	(0.0492)	
Influence of Party Leadership	0.294**	-0.881	-0.166***	
	(0.140)	(1.007)	(0.0561)	
Influence of Party Congress 	0.0948	-1.096	-0.0188	
	(0.0612)	(0.746)	(0.0381)	
CHP	4.342***	-7.717*	-0.106	
	(0.497)	(3.992)	(0.237)	
Lives in District	0.169	-3.907	0.244	
	(0.240)	(2.959)	(0.181)	
List Order	0.498***	2.045*	0.0635	
	(0.172)	(1.111)	(0.0819)	
District Size	-0.0161	0.312	0.00406	
	(0.0417)	(0.350)	(0.0272)	
District Size * List Order	-0.0313***	-0.117**	-0.00696*	
	(0.0121)	(0.0588)	(0.00392)	
Log GDP	-0.0875	2.120	-0.173	
	(0.341)	(2.773)	(0.219)	
Education	-0.00317	-0.749	-0.153*	
	(0.109)	(1.116)	(0.0791)	
Female	0.618	-5.296	0.286	
	(0.948)	(4.929)	(0.284)	
Total PQs	0.0105**			
	(0.00455)			
Constant cut1			-3.608**	
			(1.708)	
Constant cut2			-2.852*	
			(1.717)	
Constant cut3			-2.137	
			(1.717)	
Constant cut4			-1.505	
			(1.710)	
Constant	-3.672	23.28		
	(2.727)	(23.96)		
				
Observations	190	186	190	
R-squared		0.162		
				
Note: Models above use alternative measures of influence on candidate selection. Robust standard errors in parentheses *** p<0.01, ** p<0.05, * p<0.1
Table 4S
	Model 4	Model 5	Model 6	
				
Electoral Marginality	0.00933	0.0464	0.00147	
	(0.0112)	(0.0863)	(0.00531)	
Conflict	-0.129**	1.180**	0.0949***	
	(0.0594)	(0.512)	(0.0343)	
Ideological Distance	0.0432	1.251*	-0.146***	
	(0.0807)	(0.704)	(0.0501)	
Influence of Party Leadership	0.286**	-0.885	-0.160***	
	(0.136)	(0.987)	(0.0573)	
Influence of Local Party Member	-0.0226	-0.727	0.0350	
	(0.0527)	(0.621)	(0.0356)	
CHP	4.277***	-7.535*	-0.0488	
	(0.498)	(3.867)	(0.241)	
Lives in District	0.209	-3.795	0.229	
	(0.250)	(3.046)	(0.181)	
List Order	0.517***	1.966*	0.0592	
	(0.174)	(1.105)	(0.0809)	
District Size	-0.0268	0.373	0.00882	
	(0.0400)	(0.362)	(0.0275)	
District Size * List Order	-0.0306**	-0.120**	-0.00700*	
	(0.0120)	(0.0593)	(0.00385)	
Log GDP	0.00621	1.719	-0.243	
	(0.326)	(2.777)	(0.219)	
Education	0.0146	-0.660	-0.154*	
	(0.107)	(1.113)	(0.0802)	
Female	0.340	-5.420	0.367	
	(0.963)	(5.101)	(0.284)	
Total PQs	0.0112**			
	(0.00515)			
Constant cut1			-3.795**	
			(1.695)	
Constant cut2			-3.036*	
			(1.703)	
Constant cut3			-2.315	
			(1.703)	
Constant cut4			-1.681	
			(1.697)	
Constant	-3.715	22.90		
	(2.736)	(23.72)		
				
Observations	190	186	190	
R-squared		0.154		
				
Note: Models above use alternative measures of influence on candidate selection. Robust standard errors in parentheses *** p<0.01, ** p<0.05, * p<0.1
Table 5S
	Model 7	Model 8	Model 9	
				
Electoral Marginality	0.00761	0.0397	0.000648	
	(0.0108)	(0.0882)	(0.00537)	
Conflict	-0.136**	1.158**	0.0924***	
	(0.0580)	(0.519)	(0.0332)	
Ideological Distance	0.0636	1.335*	-0.143***	
	(0.0810)	(0.730)	(0.0496)	
Influence of Party Leadership	0.291**	-0.658	-0.163***	
	(0.125)	(1.012)	(0.0557)	
Influence of Supporters in District	-0.0789	-0.632	-0.00777	
	(0.0484)	(0.553)	(0.0328)	
CHP	4.293***	-6.880*	-0.0899	
	(0.492)	(3.862)	(0.238)	
Lives in District	0.215	-3.973	0.244	
	(0.248)	(3.002)	(0.182)	
List Order	0.537***	2.194*	0.0635	
	(0.179)	(1.129)	(0.0822)	
District Size	-0.0319	0.378	0.00530	
	(0.0407)	(0.365)	(0.0275)	
District Size * List Order	-0.0308**	-0.127**	-0.00704*	
	(0.0122)	(0.0597)	(0.00390)	
Log GDP	0.0300	1.241	-0.188	
	(0.327)	(2.764)	(0.216)	
Education	0.0334	-0.562	-0.151*	
	(0.106)	(1.102)	(0.0804)	
Female	0.261	-5.277	0.293	
	(0.944)	(5.507)	(0.281)	
Total PQs	0.0112**			
	(0.00502)			
Constant cut1			-3.610**	
			(1.704)	
Constant cut2			-2.855*	
			(1.713)	
Constant cut3			-2.140	
			(1.713)	
Constant cut4			-1.508	
			(1.707)	
Constant	-3.754	23.85		
	(2.697)	(23.66)		
				
Observations	190	186	190	
R-squared		0.153		
Note: Models above use alternative measures of influence on candidate selection. Robust standard errors in parentheses *** p<0.01, ** p<0.05, * p<0.1

Table 6S
	Model 10	Model 11	Model 12	
				
Electoral Marginality	-0.00259	0.0336	0.000681	
	(0.00948)	(0.0869)	(0.00533)	
Conflict	-0.113**	0.959*	0.0784**	
	(0.0567)	(0.562)	(0.0343)	
Ideological Distance	0.0571	1.754**	-0.117**	
	(0.0768)	(0.811)	(0.0472)	
Influence of Party Leadership	0.378**	-0.981	-0.154**	
	(0.161)	(0.959)	(0.0611)	
Influence of Party Congress	-0.128**	-1.062*	-0.0454	
	(0.0576)	(0.560)	(0.0333)	
Influence of Local Party 	0.250**	-1.076	-0.112**	
	(0.109)	(1.229)	(0.0453)	
Influence of Local Party Member	-0.00990	0.739	0.177***	
	(0.124)	(1.124)	(0.0556)	
Influence of Supporters in District	-0.0791	0.222	-0.0376	
	(0.0807)	(0.791)	(0.0428)	
CHP	4.202***	-8.575**	-0.0693	
	(0.391)	(4.007)	(0.242)	
Lives in District	0.0987	-4.605	0.207	
	(0.244)	(3.069)	(0.180)	
List Order	0.578***	2.442**	0.0976	
	(0.191)	(1.109)	(0.0838)	
District Size	-0.0176	0.298	0.00204	
	(0.0385)	(0.337)	(0.0289)	
District Size * List Order	-0.0346***	-0.134**	-0.00811**	
	(0.0131)	(0.0582)	(0.00395)	
Log GDP	0.0178	2.519	-0.202	
	(0.303)	(2.833)	(0.221)	
Education	0.0668	-0.511	-0.150*	
	(0.111)	(1.100)	(0.0799)	
Female	0.734	-5.147	0.387	
	(0.965)	(5.209)	(0.314)	
Total PQs	0.00880***			
	(0.00287)			
Constant cut1			-3.831**	
			(1.743)	
Constant cut2			-3.047*	
			(1.751)	
Constant cut3			-2.301	
			(1.750)	
Constant cut4			-1.661	
			(1.743)	
Constant	-5.047*	21.18		
	(2.767)	(24.45)		
				
Observations	190	186	190	
R-squared		0.183		
				
Note: Models above use alternative measures of influence on candidate selection. Robust standard errors in parentheses *** p<0.01, ** p<0.05, * p<0.1


Table 7S
	Model 13	Model 14	Model 15	
	Constituency PQ	Constituency Hour	Pork Barrel	
Electoral Marginality	0.0086 
(0.01)	0.041 
(0.08)	0.00068 
(0.01)	
Conflict	-0.13**
 (0.06)	1.07**
 (0.50)	0.090*** 
(0.03)	
Ideological Distance	0.073 
(0.11)	3.32*** 
(0.79)	-0.19*** 
(0.07)	
Influence of Party Leadership	0.29** 
(0.14)	-1.28 
(0.90)	-0.13** 
(0.05)	
Influence of Local Actors (Index)	-0.013 
(0.01)	-0.32** 
(0.16)	-0.0033 
(0.01)	
CHP	4.32*** 
(0.51)	-7.19* 
(3.74)	-0.16 
(0.24)	
Live in District	0.24
 (0.26)	-2.47 
(2.97)	0.15 
(0.18)	
List Order	0.52***
 (0.18)	1.51 
(1.11)	0.11 
(0.08)	
District Size	-0.031
 (0.04)	0.27 
(0.33)	0.0083 
(0.03)	
District Size*List Order	-0.030** 
(0.01)	-0.10* 
(0.06)	-0.0083**
 (0.00)	
Logged GDP	0.048 
(0.34)	3.72
 (2.65)	-0.27 
(0.22)	
Education	0.025 
(0.11)	-0.71 
(1.11)	-0.14* 
(0.07)	
Female	0.22 
(0.92)	-5.48
 (4.94)	0.22 
(0.28)	
Total Questions	0.011** 
(0.00)	 	 	
Constant	-4.10 
(2.77)	8.96 
(22.94)	 	
Ln alpha	0.39* (0.23)	 	 	
Cut 1	 	 	-4.32*** 
(1.67)	
Cut2	 	 	-3.56** 
(1.68)	
Cut 3	 	 	-2.85*
 (1.68)	
Cut 4	 	 	-2.22 
(1.67)	
Observations	190	186	190	

Note: Models above use index variable measuring influence of all local actors on candidate selection. Robust standard errors in parentheses *** p<0.01, ** p<0.05, *p<0.1


Table 8S	
	Model 16 AKP	Model 17 
CHP	Model 18 
AKP	Model 19 
CHP	Model 20
AKP	Model 21 
CHP	Model 22a 
AKP	Model 22b 
CHP	Model 23a 
AKP	Model 23b
CHP	
Electoral Marginality	0.047*	-0.011	0.042	0.12	0.0052	0.0054	-0.011	0.021*	0.0013	-0.0060	
	(0.03)	(0.01)	(0.10)	(0.17)	(0.01)	(0.01)	(0.01)	(0.01)	(0.01)	(0.01)	
Conflict	-0.11	-0.032	0.16	2.84***	0.052	0.21**	0.070	0.11	0.10**	0.065	
	(0.12)	(0.07)	(0.56)	(0.77)	(0.04)	(0.09)	(0.05)	(0.08)	(0.05)	(0.06)	
Ideological Distance	-0.16	-0.067	1.49	3.39***	0.14	-0.72***	0.23*	-0.19	0.28***	-0.092**	
	(0.25)	(0.08)	(1.43)	(1.09)	(0.09)	(0.21)	(0.13)	(0.19)	(0.10)	(0.04)	
Live in District	0.64	-0.17	-2.26	-2.31	0.24	0.075	0.38	0.42	0.10	0.29	
	(0.54)	(0.23)	(3.14)	(5.72)	(0.22)	(0.36)	(0.25)	(0.38)	(0.25)	(0.34)	
											
List Order	0.40**	0.39**	0.67	4.15	0.071	-0.20	0.23**	0.34*	0.11	0.29	
	(0.20)	(0.20)	(1.17)	(2.86)	(0.09)	(0.23)	(0.11)	(0.20)	(0.10)	(0.26)	
District Size	-0.44***	-0.0074	0.53	0.50	0.0095	-0.019	0.092**	0.14***	0.081**	0.013	
	(0.16)	(0.04)	(0.54)	(0.51)	(0.04)	(0.05)	(0.04)	(0.05)	(0.04)	(0.04)	
District Size*List Order	0.0018	-0.026*	-0.083	-0.19	-0.0087**	0.0076	-0.016***	-0.036***	-0.013**	-0.017	
	(0.01)	(0.01)	(0.07)	(0.13)	(0.00)	(0.01)	(0.01)	(0.01)	(0.01)	(0.01)	
Logged GDP	0.42	0.68*	0.63	0.084	0.010	-0.46	-0.69***	-0.15	0.32	0.33	
	(0.81)	(0.36)	(2.79)	(5.94)	(0.26)	(0.52)	(0.22)	(0.38)	(0.24)	(0.42)	
Education	-0.054	0.17	0.076	-1.31	-0.29***	-0.047	-0.13	-0.043	-0.39***	0.070	
	(0.23)	(0.11)	(1.35)	(1.82)	(0.08)	(0.11)	(0.11)	(0.10)	(0.11)	(0.13)	
Female	3.30***	-1.04**	-4.58	-6.28	0.45	0.012	0.45	-0.56	1.01**	-0.57	
	(0.89)	(0.45)	(4.05)	(11.07)	(0.40)	(0.40)	(0.39)	(0.35)	(0.49)	(0.47)	
Total PQs	0.17***	0.0089***									
	(0.05)	(0.00)									
Constant	-5.70	-3.69	21.6	1.14							
	(7.03)	(2.88)	(21.70)	(53.58)							
Ln Alpha	0.36	-0.094									
	(0.47)	(0.24)									
Cut 1					-2.26	-4.41	-6.11***	-1.23	0.066	2.64	
					(2.03)	(3.97)	(1.88)	(3.24)	(1.92)	(3.26)	
Cut 2					-1.23	-3.96	-5.09***	-0.44	0.88	3.50	
					(2.07)	(3.94)	(1.83)	(3.20)	(1.91)	(3.25)	
Cut 3					-0.47	-3.11	-4.46**	0.82	1.53	4.08	
					(2.08)	(3.92)	(1.83)	(3.19)	(1.91)	(3.26)	
Cut 4					0.28	-2.54	-3.50*	1.27	2.42	4.82	
Observations	125	65	121	65	125	65	115	61	125	65	
Note: Models above replicate base models using split-samples. Robust standard errors in parentheses *** p<0.01, ** p<0.05, * p<0.1


Table 9Sa
	Constituency-oriented PQs	Constituency Hours	Pork Barrel	
	AKP	CHP	AKP	CHP	AKP	CHP	
Legislative Role Orientations							
Conflict	-0.071
(0.12)	0.011
(0.07)	0.24
(0.65)	2.27*
(1.23)	0.063
(0.04)	0.19**
(0.09)	
Partisanship							
Ideological Distance	-0.35
(0.31)	-0.027
(0.08)	1.37
(1.41)	4.00**
(1.55)	0.15*
(0.09)	-0.71***
(0.21)	
Influence of Party Leadership 	-0.089
(0.20)	0.41***
(0.13)	-0.54
(1.25)	-1.04
(1.88)	-0.066
(0.07)	-0.44*
(0.25)	
Influence of Party General Congress	-0.14
(0.08)	-0.032
(0.04)	-0.82*
(0.46)	-0.91
(1.12)	0.016
(0.03)	-0.034
(0.07)	
Control Variables							
Live in District	0.62
(0.63)	-0.25
(0.23)	-2.58
(3.13)	-1.90
(5.86)	0.25
(0.22)	0.28
(0.37)	
List Order	0.68***
(0.25)	0.35**
(0.17)	1.17
(1.01)	5.23
(3.22)	0.10
(0.08)	-0.19
(0.22)	
District Size	-0.53***
(0.19)	-0.020
(0.04)	0.44
(0.56)	0.34
(0.44)	0.012
(0.04)	-0.029
(0.05)	
District Size * List Order	-0.0031
(0.02)	-0.021*
(0.01)	-0.10
(0.06)	-0.23
(0.15)	-0.0097**
(0.00)	0.0067
(0.01)	
Logged GDP	0.31
(0.65)	0.51
(0.32)	1.49
(2.90)	3.42
(5.48)	-0.091
(0.25)	-0.31
(0.47)	
Education	0.097
(0.33)	0.14
(0.09)	0.20
(1.24)	-0.73
(1.81)	-0.29***
(0.08)	-0.024
(0.11)	
Female	2.96***
(0.89)	-1.35***
(0.34)	-4.78
(4.15)	-7.26
(10.86)	0.43
(0.39)	0.042
(0.45)	
Total PQ	0.20***
(0.07)	0.0088***
(0.00)	
	
	
	
	
Constant	-3.65
(5.50)	-4.80*
(2.57)	22.1
(22.58)	-16.3
(49.51)	
	
	
Ln Alpha	0.69*
(0.41)	-0.20
(0.24)	
	
	
	
	
Cut 1	
	
	
	
	-3.30
(2.04)	-5.97*
(3.51)	
Cut 2	
	
	
	
	-2.25
(2.07)	-5.44
(3.50)	
Cut 3	
	
	
	
	-1.49
(2.07)	-4.50
(3.49)	
Cut 4	
	
	
	
	-0.74
(2.06)	-3.88
(3.49)	
Model	Negative Binomial	Negative Binomial	OLS Regression	OLS Regression	Ordered Probit	Ordered Probit	
Observations	125	65	121	65	125	65	
Standard errors in parentheses
* p < .1, ** p < .05, *** p < .01


Table 9S
	Model 23 (AKP)	Model 24
(CHP)	Model 25 (AKP)	Model 26
(CHP)	Model 27 (AKP)	Model 28
(CHP)	
							
Electoral Marginality	0.0474	-0.0180*	0.00428	0.124	0.00406	0.00332	
	(0.0324)	(0.0101)	(0.0989)	(0.159)	(0.00721)	(0.0137)	
Conflict	-0.114	-0.0113	0.184	2.980***	0.0572	0.0990	
	(0.125)	(0.0763)	(0.647)	(1.077)	(0.0383)	(0.0868)	
Ideological Distance	0.297*	-0.0159	0.295	2.686**	0.0155	-0.387***	
	(0.170)	(0.0604)	(0.978)	(1.322)	(0.0558)	(0.0982)	
Influence of Party Leadership	-0.0411	0.455***	-0.322	-1.002	-0.0326	-0.444	
	(0.269)	(0.118)	(1.293)	(1.970)	(0.0777)	(0.280)	
Influence of Party Congress	-0.146*	-0.0629*	-0.854*	-0.314	0.0166	-0.0831	
	(0.0820)	(0.0372)	(0.495)	(1.056)	(0.0305)	(0.0627)	
							
Lives in District	0.515	-0.282	-3.072	-2.684	0.190	0.439	
	(0.510)	(0.217)	(3.253)	(5.870)	(0.220)	(0.367)	
List Order	0.491**	0.463***	1.407	3.523	0.0999	-0.0871	
	(0.226)	(0.178)	(1.210)	(3.176)	(0.0922)	(0.244)	
District Size	-0.441***	-0.0324	0.487	0.381	0.0196	-0.0205	
	(0.149)	(0.0356)	(0.554)	(0.460)	(0.0419)	(0.0467)	
District Size * List Order	-0.000697	-0.0258**	-0.112	-0.156	-0.0101**	0.00154	
	(0.0146)	(0.0119)	(0.0703)	(0.148)	(0.00455)	(0.0102)	
Log GDP	0.507	0.839**	1.016	1.161	-0.106	-0.290	
	(0.789)	(0.371)	(2.981)	(5.629)	(0.257)	(0.507)	
Education	-0.0982	0.190*	0.312	-1.383	-0.285***	0.0236	
	(0.212)	(0.106)	(1.252)	(1.950)	(0.0802)	(0.104)	
Female	3.252***	-1.193***	-4.930	-6.544	0.461	-0.272	
	(1.008)	(0.359)	(4.408)	(10.73)	(0.413)	(0.384)	
Total PQs	0.162***	0.00830***					
	(0.0440)	(0.00208)					
Constant cut1					-3.363	-5.332	
					(2.159)	(4.393)	
Constant cut2					-2.322	-4.863	
					(2.190)	(4.363)	
Constant cut3					-1.567	-4.022	
					(2.192)	(4.342)	
Constant cut4					-0.827	-3.408	
					(2.179)	(4.352)	
Constant	-5.335	-7.808***	25.91	5.372			
	(6.886)	(2.949)	(23.08)	(52.82)			
							
Observations	125	65	121	65	125	65	
R-squared			0.076	0.334			
Note: Models above replicate full models using split-samples. Robust standard errors in parentheses *** p<0.01, ** p<0.05, * p<0.1

Table 11S
	Model 29	Model 30	Model 31	Model 32	Model 33	
						
Electoral Marginality	0.0117	0.0570	0.00222	-0.00370	-0.00416	
	(0.0117)	(0.0867)	(0.00510)	(0.00586)	(0.00547)	
Conflict	-0.136**	1.164**	0.0762**	0.0879**	0.0791**	
	(0.0555)	(0.459)	(0.0322)	(0.0392)	(0.0346)	
Ideological Distance	0.0187	1.253*	-0.131***	-0.0912	-0.0121	
	(0.0787)	(0.688)	(0.0495)	(0.0602)	(0.0370)	
CHP	4.337***	-6.530*	-0.0410	-0.406	-0.462**	
	(0.529)	(3.903)	(0.243)	(0.257)	(0.234)	
Lives in District	0.293	-4.507	0.200	0.237	0.127	
	(0.247)	(2.964)	(0.183)	(0.201)	(0.191)	
Parliamentary Tenure	-0.535	3.873	0.476	0.856**	0.201	
	(0.592)	(5.872)	(0.291)	(0.355)	(0.310)	
List Order	0.479**	2.046*	0.0557	0.286***	0.178**	
	(0.187)	(1.147)	(0.0801)	(0.0949)	(0.0905)	
District Size	4.39e-05	0.300	-0.0130	0.0530*	0.0262	
	(0.0421)	(0.419)	(0.0264)	(0.0306)	(0.0275)	
District Size * List Order	-0.0305**	-0.118**	-0.00588	-0.0171***	-0.0111**	
	(0.0122)	(0.0598)	(0.00384)	(0.00465)	(0.00433)	
Log GDP	-0.119	1.344	-0.0857	-0.297	0.199	
	(0.362)	(2.828)	(0.214)	(0.186)	(0.191)	
Education	0.0205	-0.706	-0.156**	-0.0953	-0.139	
	(0.111)	(1.100)	(0.0796)	(0.0712)	(0.0888)	
Female	0.490	-3.840	0.331	0.177	0.134	
	(0.988)	(5.254)	(0.275)	(0.284)	(0.331)	
Total PQs	0.0113**					
	(0.00568)					
Constant cut1			-1.555	-2.283	0.266	
			(1.648)	(1.592)	(1.596)	
Constant cut2			-0.826	-1.454	1.078	
			(1.661)	(1.561)	(1.592)	
Constant cut3			-0.129	-0.657	1.659	
			(1.666)	(1.550)	(1.590)	
Constant cut4			0.506	0.0950	2.424	
			(1.662)	(1.549)	(1.591)	
Constant	-0.742	13.97				
	(2.875)	(24.44)				
						
Observations	190	186	190	176	190	
R-squared		0.145				
						
Note: Models above control for parliamentary tenure. Robust standard errors in parentheses *** p<0.01, ** p<0.05, * p<0.1

Table 12S
	Model 34	Model 35	Model 36	
				
Electoral Marginality	0.00544	0.0181	-0.000799	
	(0.0114)	(0.0864)	(0.00531)	
Conflict	-0.154***	1.101**	0.0941***	
	(0.0581)	(0.480)	(0.0327)	
Ideological Distance	0.0668	1.570**	-0.138***	
	(0.0789)	(0.785)	(0.0492)	
Influence of Party Leadership	0.326**	-0.966	-0.171***	
	(0.143)	(0.900)	(0.0578)	
Influence of Party Congress	-0.0762**	-1.020**	-0.0255	
	(0.0357)	(0.424)	(0.0265)	
CHP	4.153***	-8.288**	-0.120	
	(0.460)	(3.996)	(0.248)	
Lives in District	0.195	-4.874*	0.186	
	(0.247)	(2.938)	(0.184)	
Parliamentary Tenure	-0.547	4.857	0.511*	
	(0.572)	(5.323)	(0.281)	
List Order	0.534***	2.662**	0.0964	
	(0.188)	(1.107)	(0.0844)	
District Size	-0.0236	0.223	-0.00731	
	(0.0407)	(0.407)	(0.0269)	
District Size * List Order	-0.0301**	-0.142**	-0.00792*	
	(0.0127)	(0.0570)	(0.00405)	
Log GDP	0.0728	2.599	-0.120	
	(0.337)	(2.925)	(0.220)	
Education	0.0482	-0.440	-0.153*	
	(0.108)	(1.092)	(0.0808)	
Female	0.267	-4.857	0.348	
	(0.973)	(5.145)	(0.294)	
Total PQs	0.0104**			
	(0.00441)			
Constant cut1			-2.825	
			(1.806)	
Constant cut2			-2.066	
			(1.814)	
Constant cut3			-1.349	
			(1.815)	
Constant cut4			-0.709	
			(1.811)	
Constant	-3.712	13.85		
	(2.941)	(25.96)		
Observations	190	186	190	
R-squared		0.181		
Note: Models above control for parliamentary tenure. Robust standard errors in parentheses
*** p<0.01, ** p<0.05, * p<0.1
Table 13S
	Model 37	Model 38	Model 39	Model 40	Model 41	
Electoral Marginality	0.0142	0.0578	0.00174	-0.00392	-0.00406	
	(0.0122)	(0.0870)	(0.00538)	(0.00599)	(0.00537)	
Conflict	-0.165***	1.140**	0.0907***	0.0879**	0.0756**	
	(0.0571)	(0.476)	(0.0333)	(0.0385)	(0.0344)	
Ideological Distance	0.0344	1.264*	-0.137***	-0.0916	-0.0119	
	(0.0783)	(0.685)	(0.0491)	(0.0597)	(0.0370)	
CHP	4.392***	-6.407	-0.109	-0.428	-0.444*	
	(0.518)	(3.894)	(0.249)	(0.261)	(0.235)	
Lives in District	0.276	-4.549	0.208	0.235	0.125	
	(0.234)	(2.981)	(0.186)	(0.200)	(0.191)	
Parliamentary Tenure	-0.267	3.879	0.477	0.862**	0.204	
	(0.668)	(5.813)	(0.310)	(0.357)	(0.310)	
Party Policy Advocacy	0.331***	-0.486	0.229***	0.0670	-0.0806	
	(0.118)	(1.088)	(0.0806)	(0.0758)	(0.0864)	
List Order	0.410**	2.069*	0.0545	0.285***	0.179**	
	(0.179)	(1.157)	(0.0790)	(0.0943)	(0.0907)	
District Size	-0.00493	0.297	-0.0109	0.0532*	0.0260	
	(0.0426)	(0.419)	(0.0260)	(0.0305)	(0.0274)	
District Size * List Order	-0.0274**	-0.119**	-0.00591	-0.0171***	-0.0112**	
	(0.0118)	(0.0599)	(0.00374)	(0.00465)	(0.00438)	
Log GDP	-0.261	1.335	-0.0795	-0.304	0.201	
	(0.384)	(2.842)	(0.216)	(0.185)	(0.190)	
Education	0.0178	-0.748	-0.147*	-0.0889	-0.147	
	(0.113)	(1.108)	(0.0764)	(0.0731)	(0.0900)	
Female	0.283	-3.858	0.354	0.191	0.123	
	(0.820)	(5.254)	(0.257)	(0.283)	(0.340)	
Total PQs	0.0123**					
	(0.00563)					
Constant cut1			-0.679	-2.095	-0.0330	
			(1.703)	(1.601)	(1.637)	
Constant cut2			0.0707	-1.270	0.779	
			(1.720)	(1.564)	(1.637)	
Constant cut3			0.776	-0.473	1.355	
			(1.727)	(1.552)	(1.635)	
Constant cut4			1.431	0.283	2.126	
			(1.728)	(1.549)	(1.635)	
Constant	-0.727	15.96				
	(2.971)	(24.77)				
						
Observations	190	186	190	176	190	
R-squared		0.146				
						
Note: Models above controls for “Party Policy Advocacy” as a partisan role. Robust standard errors in parentheses
*** p<0.01, ** p<0.05, * p<0.1
Table 14S
	Model 42	Model 43	Model 44	
				
Electoral Marginality	0.00758	0.0311	-3.72e-05	
	(0.0121)	(0.0864)	(0.00563)	
Conflict	-0.179***	1.029**	0.101***	
	(0.0609)	(0.515)	(0.0356)	
Ideological Distance	0.0954	1.604**	-0.139***	
	(0.0824)	(0.775)	(0.0484)	
Influence of Party Leadership	0.375***	-0.983	-0.151**	
	(0.141)	(0.915)	(0.0602)	
Influence of Party Congress	-0.0685*	-0.993**	-0.0228	
	(0.0373)	(0.416)	(0.0271)	
Party Policy Advocacy	0.366***	-0.554	0.214***	
	(0.114)	(1.033)	(0.0819)	
CHP	4.184***	-8.223**	-0.189	
	(0.460)	(3.935)	(0.253)	
Lives in District	0.183	-4.448	0.241	
	(0.235)	(2.925)	(0.185)	
List Order	0.463***	2.448**	0.0684	
	(0.175)	(1.097)	(0.0828)	
District Size	-0.0414	0.343	0.00514	
	(0.0421)	(0.343)	(0.0267)	
District Size * List Order	-0.0256**	-0.139**	-0.00725*	
	(0.0120)	(0.0589)	(0.00390)	
Log GDP	-0.0738	2.195	-0.147	
	(0.371)	(2.815)	(0.216)	
Education	0.0352	-0.450	-0.137*	
	(0.110)	(1.096)	(0.0767)	
Female	0.0476	-5.597	0.288	
	(0.763)	(5.095)	(0.262)	
Total PQs	0.0119**			
	(0.00481)			
Constant cut1			-2.548	
			(1.749)	
Constant cut2			-1.776	
			(1.762)	
Constant cut3			-1.056	
			(1.764)	
Constant cut4			-0.403	
			(1.762)	
Constant	-4.323	23.09		
	(2.888)	(24.42)		
Observations	190	186	190	
R-squared		0.178		
Note: Models above controls for “Party Policy Advocacy” as a partisan role. Robust standard errors in parentheses *** p<0.01, ** p<0.05, * p<0.1
